# Supplementary material for: Key molecular alterations in endothelial cells in human glioblastoma uncovered through single-cell RNA sequencing
Source: PubMed Central journal article supplement (PMC8410070; doi:10.1172/jci.insight.150861), 2021-08-09
Supplement: jciinsight-6-150861-s063.pdf [file jciinsight-6-150861-s063.pdf]

**Table S5 Molecular phenotypes of freshly isolated ECs from GBM and tumor peripheral tissue**

| Assigned phenotype                         | Nr.       | Expressed genes typical of                                                                                                                                                                                                                                                                                                                                                                                                                                                                                                                                                                                 |
|--------------------------------------------|-----------|------------------------------------------------------------------------------------------------------------------------------------------------------------------------------------------------------------------------------------------------------------------------------------------------------------------------------------------------------------------------------------------------------------------------------------------------------------------------------------------------------------------------------------------------------------------------------------------------------------|
| peripheral endothelial cell type I (Pe1)   | cluster 1 | <ul style="list-style-type: none"> <li>• Vascular integrity: KLF2[1]; TIMP3[2]</li> <li>• BBB Transporter: SLC2A1[3]; SLCO1A2[4]</li> <li>• BBB enriched genes: TSC22D1; DEGS2; NET1; SPARCL1; ATP10A; JUND[5]</li> </ul>                                                                                                                                                                                                                                                                                                                                                                                  |
| tumor core endothelial cell type I (Co1)   | cluster 2 | <ul style="list-style-type: none"> <li>• Basement membrane remodeling: COL4A1[6]; COL4A2; LAMB1[7]; LAMC1[8]; LAMA4[9]; HSPG2[10];PXDN, PLOD1; NID1; NID2[11]</li> <li>• Cell migration and cytoskeleton associated genes: MYO1B[12]; CD93[13, 14], INSR[15]; SPARC[16], RASGRP3[17];</li> <li>• Angiogenesis: KDR, PGF, ANGPT2, APLN[18], NOX4[19]; PTP4A3[20]; FLT4[21]</li> <li>• Vascular remodeling: NOTCH4[22]; UNC5B[23]</li> <li>• Tip cell markers: COL4A1; PXDN; COL4A2; NID1; CD93; ANGPT2; LAMB1; MCAM; TCF4; LAMC1; LAMA4; MYO1B; SPARC; PGF; NOTCH4; SOX4; PLOD1; ITGA5; APLN[24]</li> </ul> |
| tumor core endothelial cell type II (Co2)  | cluster 3 | <ul style="list-style-type: none"> <li>• Cytoskeleton organization: TMSB4X; ACTB; ACTG1; TMSB10; VIM [25]; PFN1[26]; MYL6; MARCKSL1; ARPC2; MYL12B; CFL1[27]</li> <li>• Ribosomal genes: RPLP1; RPS2; RPLP2; RPL39; RPS24; RPL41; RPL6; RPL13; RPL8; RPL35; RPLS8; RPS28; RPS12; RPS26; RPS6; RPL36; RPL10; RPL15; RPS4X; RPLP0</li> <li>• Tip cell markers: GAPDH; ACTG1; CFL1; VIM; FKBP1A; CALM1; MARCKSL1; GNG11[24]</li> </ul>                                                                                                                                                                        |
| peripheral endothelial cell type I (Pe1)   | cluster 4 | <ul style="list-style-type: none"> <li>• Inflammation and cytokine: CCL4; CCL4L2; CCL3L1; ACKR1[28]; CCL3[29]</li> <li>• MHC class II molecules: HLA-DRB1; HLA-DRA; HLA-DPA1; HLA-DPB1; HLA-DQB1</li> </ul>                                                                                                                                                                                                                                                                                                                                                                                                |
| tumor core endothelial cell type III (Co3) | cluster 5 | <ul style="list-style-type: none"> <li>• Inflammation and cytokines: NR4A3; IL1B; IL1R1; ACKR1[28, 30, 31]</li> <li>• Immune cell recruitment: SELE; SELP;VCAM1[32]</li> </ul>                                                                                                                                                                                                                                                                                                                                                                                                                             |

1. Sangwung, P., et al., *KLF2 and KLF4 control endothelial identity and vascular integrity*. JCI Insight, 2017. **2**(4): p. e91700.
2. Menge, T., et al., *Mesenchymal stem cells regulate blood-brain barrier integrity through TIMP3 release after traumatic brain injury*. Sci Transl Med, 2012. **4**(161): p. 161ra150.
3. Veys, K., et al., *Role of the GLUT1 Glucose Transporter in Postnatal CNS Angiogenesis and Blood-Brain Barrier Integrity*. Circ Res, 2020. **127**(4): p. 466-482.
4. Cheng, Z., et al., *Hydrophilic anti-migraine triptans are substrates for OATP1A2, a transporter expressed at human blood-brain barrier*. Xenobiotica, 2012. **42**(9): p. 880-90.
5. Munji, R.N., et al., *Profiling the mouse brain endothelial transcriptome in health and disease models reveals a core blood-brain barrier dysfunction module*. Nat Neurosci, 2019. **22**(11): p. 1892-1902.
6. Ratelade, J., et al., *Severity of arterial defects in the retina correlates with the burden of intracerebral haemorrhage in COL4A1-related stroke*. J Pathol, 2018. **244**(4): p. 408-420.
7. Ross, E.A., et al., *Mouse stem cells seeded into decellularized rat kidney scaffolds endothelialize and remodel basement membranes*. Organogenesis, 2012. **8**(2): p. 49-55.
8. Holm Nielsen, S., et al., *A novel biomarker of laminin turnover is associated with disease progression and mortality in chronic kidney disease*. PLoS One, 2018. **13**(10): p. e0204239.
9. Beguin, E.P., et al., *Flow-induced Reorganization of Laminin-integrin Networks Within the Endothelial Basement Membrane Uncovered by Proteomics*. Mol Cell Proteomics, 2020. **19**(7): p. 1179-1192.
10. Ishijima, M., et al., *Perlecan modulates VEGF signaling and is essential for vascularization in endochondral bone formation*. Matrix Biol, 2012. **31**(4): p. 234-45.
11. Bader, B.L., et al., *Compound genetic ablation of nidogen 1 and 2 causes basement membrane defects and perinatal lethality in mice*. Mol Cell Biol, 2005. **25**(15): p. 6846-56.
12. Makowska, K.A., et al., *Specific Myosins Control Actin Organization, Cell Morphology, and Migration in Prostate Cancer Cells*. Cell Rep, 2015. **13**(10): p. 2118-25.
13. Lugano, R., et al., *CD93 promotes beta1 integrin activation and fibronectin fibrillogenesis during tumor angiogenesis*. J Clin Invest, 2018. **128**(8): p. 3280-3297.
14. Langenkamp, E., et al., *Elevated expression of the C-type lectin CD93 in the glioblastoma vasculature regulates cytoskeletal rearrangements that enhance*

- vessel function and reduce host survival. *Cancer Res*, 2015. **75**(21): p. 4504-16.
15. Roudnicky, F., et al., *High expression of insulin receptor on tumour-associated blood vessels in invasive bladder cancer predicts poor overall and progression-free survival*. *J Pathol*, 2017. **242**(2): p. 193-205.
  16. Tichet, M., et al., *Tumour-derived SPARC drives vascular permeability and extravasation through endothelial VCAM1 signalling to promote metastasis*. *Nat Commun*, 2015. **6**: p. 6993.
  17. Randhawa, P.K., et al., *The Ras activator RasGRP3 mediates diabetes-induced embryonic defects and affects endothelial cell migration*. *Circ Res*, 2011. **108**(10): p. 1199-208.
  18. Mastrella, G., et al., *Targeting APLN/APLNR Improves Antiangiogenic Efficiency and Blunts Proinvasive Side Effects of VEGFA/VEGFR2 Blockade in Glioblastoma*. *Cancer Res*, 2019. **79**(9): p. 2298-2313.
  19. Miyano, K., et al., *The NADPH oxidase NOX4 promotes the directed migration of endothelial cells by stabilizing vascular endothelial growth factor receptor 2 protein*. *J Biol Chem*, 2020. **295**(33): p. 11877-11890.
  20. Zimmerman, M.W., et al., *Protein-tyrosine phosphatase 4A3 (PTP4A3) promotes vascular endothelial growth factor signaling and enables endothelial cell motility*. *J Biol Chem*, 2014. **289**(9): p. 5904-13.
  21. Tammela, T., et al., *VEGFR-3 controls tip to stalk conversion at vessel fusion sites by reinforcing Notch signalling*. *Nat Cell Biol*, 2011. **13**(10): p. 1202-13.
  22. Murphy, P.A., et al., *Constitutively active Notch4 receptor elicits brain arteriovenous malformations through enlargement of capillary-like vessels*. *Proc Natl Acad Sci U S A*, 2014. **111**(50): p. 18007-12.
  23. Lu, X., et al., *The netrin receptor UNC5B mediates guidance events controlling morphogenesis of the vascular system*. *Nature*, 2004. **432**(7014): p. 179-86.
  24. Goveia, J., et al., *An Integrated Gene Expression Landscape Profiling Approach to Identify Lung Tumor Endothelial Cell Heterogeneity and Angiogenic Candidates*. *Cancer Cell*, 2020. **37**(1): p. 21-36 e13.
  25. Langlois, B., et al., *Vimentin knockout results in increased expression of sub-endothelial basement membrane components and carotid stiffness in mice*. *Sci Rep*, 2017. **7**(1): p. 11628.
  26. Gau, D., et al., *Structure-based virtual screening identifies a small-molecule inhibitor of the profilin 1-actin interaction*. *J Biol Chem*, 2018. **293**(7): p. 2606-2616.
  27. Zhang, H.H., et al., *S-nitrosylation of cofilin-1 mediates estradiol-17beta-stimulated endothelial cytoskeleton remodeling*. *Mol Endocrinol*, 2015. **29**(3): p. 434-44.
  28. Girbl, T., et al., *Distinct Compartmentalization of the Chemokines CXCL1 and CXCL2 and the Atypical Receptor ACKR1 Determine Discrete Stages of*

*Neutrophil Diapedesis*. Immunity, 2018. **49**(6): p. 1062-1076 e6.

29. Chui, R. and K. Dorovini-Zis, *Regulation of CCL2 and CCL3 expression in human brain endothelial cells by cytokines and lipopolysaccharide*. J Neuroinflammation, 2010. **7**: p. 1.
30. Hauptmann, J., et al., *Interleukin-1 promotes autoimmune neuroinflammation by suppressing endothelial heme oxygenase-1 at the blood-brain barrier*. Acta Neuropathol, 2020. **140**(4): p. 549-567.
31. Minten, C., et al., *DARC shuttles inflammatory chemokines across the blood-brain barrier during autoimmune central nervous system inflammation*. Brain, 2014. **137**(Pt 5): p. 1454-69.
32. Huang, H., et al., *VEGF suppresses T-lymphocyte infiltration in the tumor microenvironment through inhibition of NF-kappaB-induced endothelial activation*. FASEB J, 2015. **29**(1): p. 227-38.
